# Supplementary material
Source: HighWire-hosted journal article supplement (https://bjsm.bmj.com/content/53/8/513)
Supplement: inline-supplementary-material-1 [file inline-supplementary-material-1.pdf]

**Supplementary 1.** Search strategy and number of records initially retrieved.

| <b>Database</b> | <b>Outcome of Interest</b> | <b>Population of Interest</b>                          | <b>Total records</b> |
|-----------------|----------------------------|--------------------------------------------------------|----------------------|
| PubMed          | sleep AND                  | elite OR competitive OR athlete/s OR sport OR player/s | 1124                 |
| SCOPUS          | sleep AND                  | elite OR competitive OR athlete/s OR sport OR player/s | 1823                 |
| SPORTDiscus     | sleep AND                  | elite OR competitive OR athlete/s OR sport OR player/s | 1119                 |
| <b>Total</b>    |                            |                                                        | 4066                 |

The literature search examined databases from their inception until 26<sup>th</sup> February 2018. The search strategy required any of the potential combinations of keywords to be found in the title and/or abstract.
