# Supplementary material
Source: HighWire-hosted journal article supplement (https://bjsm.bmj.com/content/53/8/513)
Supplement: inline-supplementary-material-4 [file inline-supplementary-material-4.pdf]

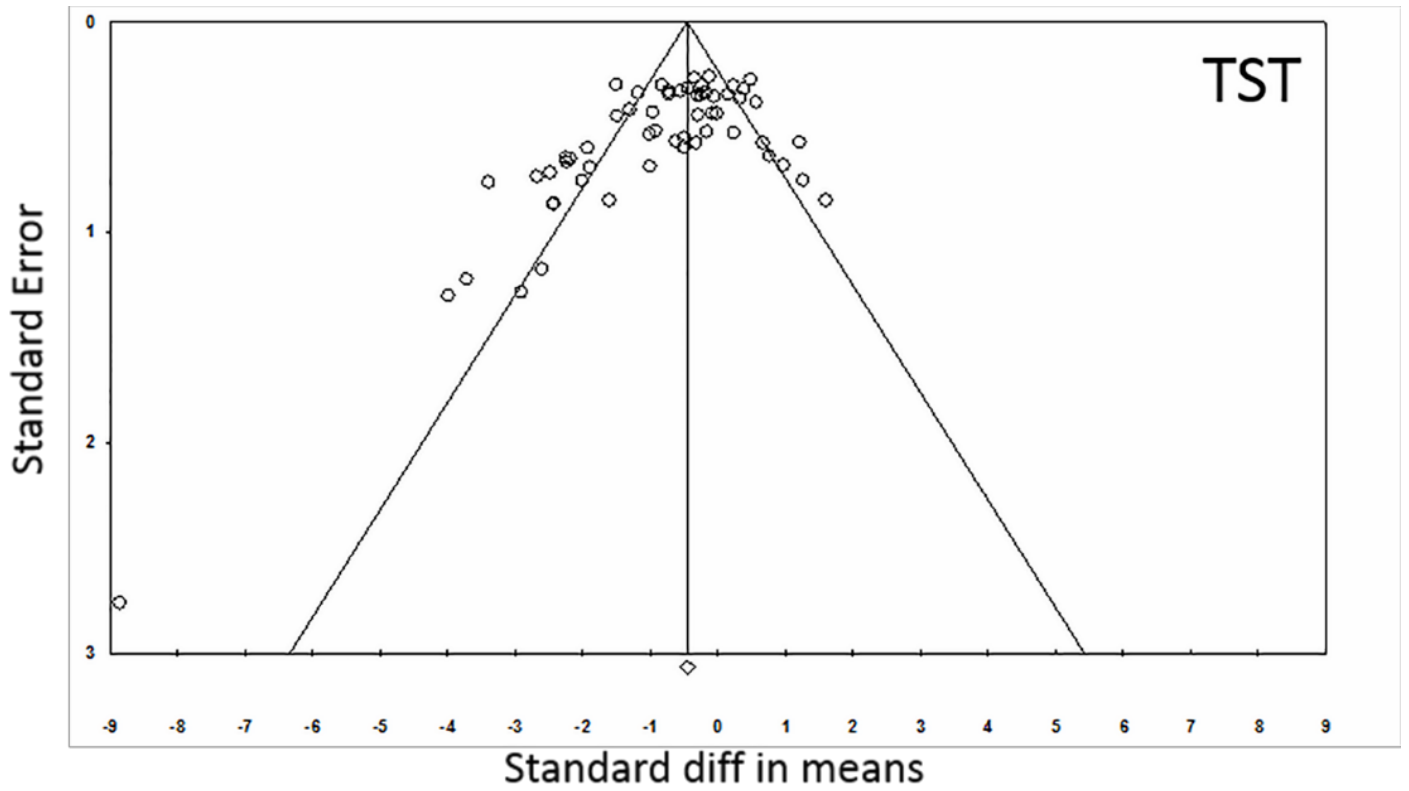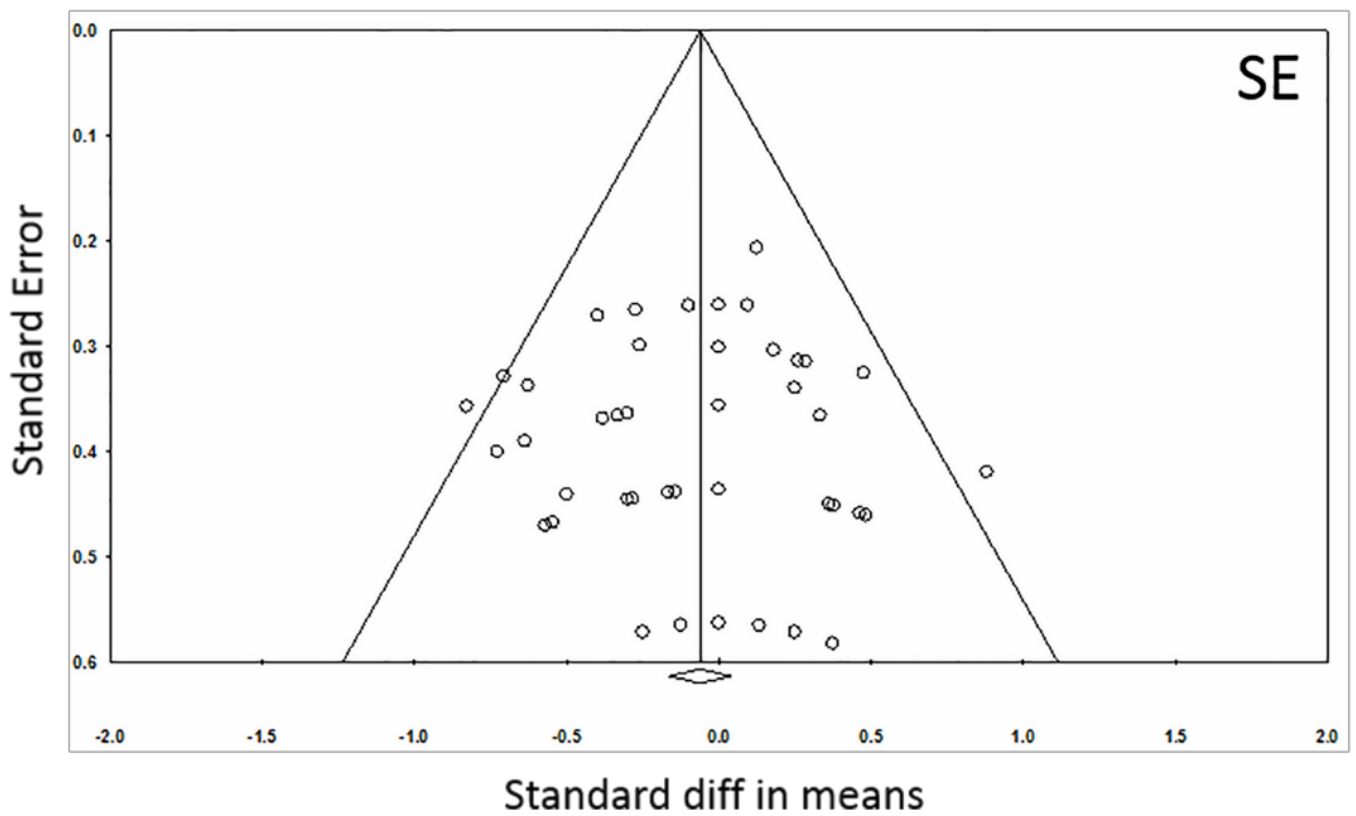

**Supplementary 4.** Funnel plots for detecting publication bias. Data from all time-point comparisons (A-E) is represented for TST (top) and SE (bottom).
