# Supplementary material
Source: HighWire-hosted journal article supplement (https://bjsm.bmj.com/content/53/8/513)
Supplement: inline-supplementary-material-7 [file inline-supplementary-material-7.pdf]

**Supplementary 7.** Sleep of athletes recorded during a training or non-competition period

| Study                                  | Sport             | Training Description                               | Sex    | n  | Recording period (per athlete) | Mean (SD)     |                 |               |                |                |
|----------------------------------------|-------------------|----------------------------------------------------|--------|----|--------------------------------|---------------|-----------------|---------------|----------------|----------------|
|                                        |                   |                                                    |        |    |                                | Age (yrs)     | TST (min)       | SE (%)        | SOL (min)      | WASO (min)     |
| <b>Competitive-elite</b>               |                   |                                                    |        |    |                                |               |                 |               |                |                |
| Caia et al. 2017                       | RL                | Pre-season training                                | Male   | 7  | 7 nights                       | 24 (2)        | 414 (24)        | 87 (3)        | 20 (14)        | -              |
| Caia et al. 2017                       | RL                | Regular training                                   | Male   | 63 | 10 nights*                     | -             | 416 (84)        | -             | -              | -              |
| Caia et al. 2017                       | RL                | Regular training                                   | Male   | 15 | 7 nights                       | 26 (4)        | 451 (55)        | 88 (4)        | 16 (18)        | -              |
| Fuller et al. 2017                     | Multi-sport       | Off-season training                                | Male   | 21 | 3 nights*                      | 23 (3)        | 447 (46)        | 89 (5)        | 16 (16)        | 41 (22)        |
| George et al. 2003                     | American football | Pre-season training                                | Male   | 52 | 1 night                        | 26 (2)        | 359 (27)        | 90 (7)        | 21 (20)        | -              |
| Knufinke et al. 2017                   | Multi-sport       | Regular training                                   | Both   | 98 | 7 nights                       | 19 (3)        | 470 (68)        | 88 (5)        | 14 (16)        | 33 (17)        |
| Lalor et al. 2018                      | ARF               | Pre-season training                                | Male   | 45 | 10 nights                      | 22 (3)        | 533 (-)         | 81 (-)        | 12 (-)         | -              |
| Lastella et al. 2015                   | Cycling           | Regular training (base)                            | Male   | 21 | 7 nights                       | 22 (3)        | 444 (48)        | 87 (5)        | -              | -              |
| Lastella et al. 2015                   | Cycling           | Regular training (high load)                       | Male   | 21 | 7 nights                       | "             | 432 (54)        | 84 (5)        | -              | -              |
| Lastella et al. 2015                   | Cycling           | Regular training (high load)                       | Male   | 21 | 7 nights                       | "             | 420 (54)        | 85 (5)        | -              | -              |
| Lastella et al. 2015                   | Cycling           | Regular training (high load)                       | Male   | 21 | 7 nights                       | "             | 426 (60)        | 85 (6)        | -              | -              |
| Lastella et al. 2015                   | Cycling           | Regular training (recovery)                        | Male   | 21 | 7 nights                       | "             | 426 (54)        | 86 (5)        | -              | -              |
| Lastella et al. 2015                   | Cycling           | Regular training                                   | Male   | 21 | 6 nights                       | 20 (2)        | 444 (36)        | 86 (0)        | 28 (14)        | -              |
| Lastella et al. 2015                   | Multi-sport       | Regular training (individual sport)                | Both   | 66 | 12 nights*                     | 22 (3)        | 390 (66)        | 86 (6)        | 22 (27)        | -              |
| Lastella et al. 2015                   | Multi-sport       | Regular training (team sport)                      | Both   | 58 | 12 nights*                     | "             | 420 (72)        | 86 (5)        | 16 (20)        | -              |
| Leeder et al. 2012                     | Multi-sport       | Regular training                                   | Both   | 46 | 4 nights                       | -             | 415 (43)        | 81 (6)        | 18 (17)        | 77 (31)        |
| Miller et al. 2017                     | ARF               | Regular training                                   | Male   | 16 | 7 nights                       | -             | 408 (72)        | -             | -              | 71 (32)        |
| Miller et al. 2017                     | RU                | Regular training                                   | Male   | 28 | 7 nights                       | -             | 432 (96)        | -             | -              | 56 (26)        |
| Miller et al. 2017                     | Soccer            | Regular training                                   | Male   | 7  | 7 nights                       | -             | 402 (120)       | -             | -              | 57 (23)        |
| Nedelec et al. 2017                    | Soccer            | Pre-season training                                | Male   | 1  | 5 nights                       | 31            | 406 (52)        | 90 (3)        | 18 (13)        | -              |
| O'Donnell & Driller. 2017 <sup>^</sup> | Netball           | Pre-season training                                | Female | 26 | 7 nights                       | 23 (6)        | 436 (51)        | 81 (7)        | 29 (16)        | -              |
| O'Donnell et al. 2018                  | Netball           | In-season training (rest day)                      | Female | 10 | 1 night                        | 23 (6)        | 526 (63)        | 85 (7)        | 28 (35)        | -              |
| O'Donnell et al. 2018                  | Netball           | In-season training (training day)                  | Female | 10 | 1 night                        | "             | 481 (77)        | 82 (9)        | 39 (29)        | -              |
| Pitchford et al. 2017                  | ARF               | Pre-season training (home)                         | Male   | 19 | 8 nights                       | 22 (4)        | 419 (26)        | 85 (7)        | -              | 69 (30)        |
| Pitchford et al. 2017                  | ARF               | Pre-season training (camp)                         | Male   | 19 | 8 nights                       | "             | 417 (38)        | 79 (7)        | -              | 97 (34)        |
| Richmond et al. 2004                   | ARF               | In-season training                                 | Male   | 10 | 5 nights                       | 23 (2)        | 505 (16)        | 88 (4)        | -              | 57 (18)        |
| Richmond et al. 2007                   | ARF               | In-season training                                 | Male   | 19 | 4 nights                       | 24 (3)        | 531 (6)         | 93 (1)        | -              | 42 (6)         |
| Sargent et al. 2014                    | Multi-sport       | Regular training                                   | Both   | 70 | 14 nights                      | 20 (3)        | 390 (84)        | 86 (7)        | -              | -              |
| Schaal et al. 2015 <sup>^</sup>        | Synch Swimming    | Regular training (base load)                       | Female | 10 | 7 nights                       | 20 (0)        | 433 (11)        | 85 (1)        | 17 (2)         | -              |
| Schaal et al. 2015 <sup>^</sup>        | Synch Swimming    | Regular training (high load)                       | Female | 10 | 7 nights                       | "             | 413 (9)         | 83 (2)        | 28 (6)         | -              |
| Staunton et al. 2017                   | Basketball        | In-season training (home)                          | Female | 17 | 30 weeks                       | 28 (4)        | 450 (90)        | 92 (3)        | -              | -              |
| Staunton et al. 2017                   | Basketball        | In-season training (away)                          | Female | 17 | 30 weeks                       | "             | 432 (78)        | 91 (3)        | -              | -              |
| Thornton et al. 2017                   | RL                | Pre-season training (home)                         | Male   | 31 | 7 nights                       | 25 (4)        | 437 (67)        | 88 (4)        | 21 (19)        | 42 (17)        |
| Thornton et al. 2017                   | RL                | Pre-season training (camp)                         | Male   | 31 | 13 nights                      | "             | 351 (63)        | 80 (8)        | 9 (7)          | 82 (40)        |
| Thornton et al. 2017                   | RL                | Pre-season training                                | Male   | 14 | 16 weeks                       | 26 (3)        | 415 (84)        | 92 (3)        | -              | 35 (16)        |
| Tuomilehto et al. 2016                 | Ice Hockey        | Not specified                                      | Male   | 23 | 1 night                        | 25 (2)        | 415 (88)        | -             | 18 (21)        | -              |
| Van Ryswyk et al. 2017                 | ARF               | Pre-season training                                | Male   | 22 | 7 nights                       | 24 (2)        | 427 (55)        | 82 (7)        | -              | -              |
| <b>Mean (SD)</b>                       |                   |                                                    |        |    |                                | <b>24 (3)</b> | <b>433 (57)</b> | <b>86 (5)</b> | <b>21 (17)</b> | <b>58 (24)</b> |
| <b>Semi-elite</b>                      |                   |                                                    |        |    |                                |               |                 |               |                |                |
| Caia et al. 2017                       | RL                | Regular training (sub-elite juniors)               | Male   | 15 | 7 nights                       | 22 (2)        | 409 (69)        | 85 (6)        | 20 (18)        | -              |
| Caia et al. 2017                       | RL                | Regular training (elite juniors)                   | Male   | 15 | 7 nights                       | 19 (1)        | 438 (98)        | 86 (7)        | 24 (27)        | -              |
| Dobrosielski et al. 2016               | American football | Pre-season camp (high risk for sleep disorder)     | Male   | 25 | 1 night                        | 20 (1)        | 252 (66)        | -             | -              | -              |
| Dobrosielski et al. 2016               | American football | Pre-season camp (low risk for sleep disorder)      | Male   | 26 | 1 night                        | "             | 228 (54)        | -             | -              | -              |
| Duncan et al. 2017                     | Judo              | Training camp                                      | Both   | 9  | 6 nights                       | 18 (2)        | 450 (42)        | 88 (6)        | 29 (28)        | 8 (7)          |
| Fietze et al. 2009                     | Ballet            | Regular training (10 weeks prior to premiere)      | Both   | 24 | 1 week                         | 27 (5)        | 418 (43)        | 81 (4)        | 18 (10)        | 72 (28)        |
| Fietze et al. 2009                     | Ballet            | Regular training (1 week prior to premiere)        | Both   | 24 | 1 week                         | "             | 392 (42)        | 79 (5)        | 15 (7)         | 74 (27)        |
| Fowler et al. 2017                     | Soccer            | Training camp                                      | Male   | 20 | 6 nights                       | 16 (1)        | 424 (76)        | 82 (7)        | -              | -              |
| Hoshikawa et al. 2013                  | Running           | Training camp (normoxic)                           | Female | 7  | 1 night                        | 20 (1)        | 461 (72)        | 94 (6)        | 6 (9)          | 25 (20)        |
| Hoshikawa et al. 2013                  | Running           | Training camp (hypoxic first night)                | Female | 7  | 1 night                        | "             | 442 (56)        | 92 (7)        | 14 (11)        | 25 (25)        |
| Hoshikawa et al. 2013                  | Running           | Training camp (hypoxic sixth night)                | Female | 7  | 1 night                        | "             | 415 (63)        | 90 (12)       | 17 (22)        | 29 (32)        |
| Juliff et al. 2018                     | Netball           | Regular training (successful teams)                | Female | 42 | 12 nights                      | 19 (1)        | 447 (62)        | 88 (4)        | 8 (4)          | -              |
| Juliff et al. 2018                     | Netball           | Regular training (unsuccessful teams)              | Female | 42 | 12 nights                      | "             | 440 (51)        | 87 (4)        | 6 (6)          | -              |
| Kolling et al. 2016                    | Rowing            | Tournament preparation (camp week 1 – higher load) | Both   | 14 | 1 week                         | 18 (1)        | 343 (30)        | 84 (5)        | 21 (10)        | 37 (15)        |
| Kolling et al. 2016                    | Rowing            | Tournament preparation (camp week 2 – higher load) | Both   | 14 | 1 week                         | "             | 340 (32)        | 82 (7)        | 20 (10)        | 48 (25)        |
| Kolling et al. 2016                    | Rowing            | Tournament preparation (camp week 3 - lower load)  | Both   | 14 | 1 week                         | "             | 357 (25)        | 82 (6)        | 22 (13)        | 50 (21)        |
| Kolling et al. 2016                    | Rowing            | Tournament preparation (camp week 4 – lower load)  | Both   | 14 | 1 week                         | "             | 369 (45)        | 81 (8)        | 20 (14)        | 57 (25)        |
| Kolling et al. 2017                    | Rowing            | Tournament preparation (2 nights before travel)    | Both   | 23 | 1 night                        | 18 (1)        | 349 (37)        | -             | -              | -              |
| Kolling et al. 2017                    | Rowing            | Tournament preparation (1 night before travel)     | Both   | 23 | 1 night                        | "             | 395 (57)        | -             | -              | -              |
| Kolling et al. 2017                    | Rowing            | Tournament preparation (1 night after travel)      | Both   | 23 | 1 night                        | "             | 415 (64)        | -             | -              | -              |
| Kolling et al. 2017                    | Rowing            | Tournament preparation (2 nights after travel)     | Both   | 23 | 1 night                        | "             | 437 (65)        | -             | -              | -              |
| Lastella et al. 2014                   | Soccer            | Tournament preparation (sea level)                 | Male   | 16 | 3 nights                       | 19 (1)        | 450 (78)        | 85 (-)        | -              | -              |
| Lastella et al. 2014                   | Soccer            | Tournament preparation (low altitude)              | Male   | 16 | 10 nights                      | "             | 396 (78)        | -             | -              | -              |

|                                           |          |                                                |        |    |            |        |               |                 |               |                |                |
|-------------------------------------------|----------|------------------------------------------------|--------|----|------------|--------|---------------|-----------------|---------------|----------------|----------------|
| Lastella et al. 2014                      | Soccer   | Tournament preparation (moderate altitude)     | Male   | 16 | 6 nights   | "      | 414 (54)      | -               | -             | -              |                |
| Lastella et al. 2017                      | Soccer   | Tournament preparation                         | Male   | 16 | 15 nights  | 19 (1) | 396 (48)      | 84 (1)          | -             | -              |                |
| Netzer et al. 2001                        | Cycling  | Regular training                               | Male   | 15 | 1 night    | 24 (-) | -             | 93 (3)          | 20 (-)        | -              |                |
| Roach et al. 2013                         | Soccer   | Tournament preparation (sea level)             | Male   | 14 | 2 nights   | 16 (1) | 420 (30)      | 80 (3)          | -             | -              |                |
| Roach et al. 2013                         | Soccer   | Tournament preparation (at altitude one day)   | Male   | 14 | 1 night    | "      | 366 (42)      | 75 (5)          | -             | -              |                |
| Roach et al. 2013                         | Soccer   | Tournament preparation (at altitude two weeks) | Male   | 14 | 4 nights   | "      | 390 (42)      | 77 (5)          | -             | -              |                |
| Roach et al. 2013                         | Soccer   | Tournament preparation (sea level)             | Male   | 12 | 2 nights   | 17 (1) | 342 (42)      | 78 (6)          | -             | -              |                |
| Roach et al. 2013                         | Soccer   | Tournament preparation (at altitude one day)   | Male   | 12 | 1 night    | "      | 354 (54)      | 78 (8)          | -             | -              |                |
| Roach et al. 2013                         | Soccer   | Tournament preparation (at altitude two weeks) | Male   | 12 | 4 nights   | "      | 384 (60)      | 80 (6)          | -             | -              |                |
| Robey et al. 2014 <sup>^</sup>            | Soccer   | Regular training (light load)                  | Male   | 12 | 12 nights* | 19 (1) | 433 (39)      | 89 (6)          | 21 (11)       | 15 (11)        |                |
| Robey et al. 2014 <sup>^</sup>            | Soccer   | Regular training (heavy load)                  | Male   | 12 | 3 nights*  | "      | 455 (56)      | 90 (5)          | 19 (13)       | 16 (7)         |                |
| Romyn et al. 2016                         | Netball  | Tournament preparation                         | Female | 8  | 7 nights   | 20 (2) | 491 (27)      | 85 (4)          | 28 (26)       | 35 (8)         |                |
| Sargent et al. 2014                       | Swimming | Regular training (prior to training)           | Both   | 7  | 12 nights  | 23 (2) | 324 (78)      | 71 (15)         | 41 (43)       | -              |                |
| Sargent et al. 2014                       | Swimming | Regular training (prior to rest)               | Both   | 7  | 2 nights   | "      | 426 (72)      | 77 (8)          | 32 (22)       | -              |                |
| Sargent et al. 2013                       | Soccer   | Tournament preparation (sea level)             | Male   | 6  | 1 night    | 16 (1) | 480 (42)      | 86 (5)          | 18 (8)        | 64 (39)        |                |
| Sargent et al. 2013                       | Soccer   | Tournament preparation (at altitude one day)   | Male   | 6  | 1 night    | "      | 444 (48)      | 82 (6)          | 14 (7)        | 81 (34)        |                |
| Sargent et al. 2013                       | Soccer   | Tournament preparation (at altitude one week)  | Male   | 6  | 1 night    | "      | 480 (66)      | 86 (5)          | 23 (19)       | 59 (32)        |                |
| Sargent et al. 2013                       | Soccer   | Tournament preparation (at altitude two weeks) | Male   | 6  | 1 night    | "      | 462 (54)      | 89 (4)          | 12 (8)        | 47 (31)        |                |
| Taylor et al. 1997                        | Swimming | Regular training (normal load)                 | Female | 7  | 1 night    | 19 (2) | 451 (30)      | -               | 19 (4)        | 4 (6)          |                |
| Taylor et al. 1997                        | Swimming | Regular training (high load)                   | Female | 7  | 1 night    | "      | 472 (61)      | -               | 17 (6)        | 9 (14)         |                |
| Taylor et al. 1997                        | Swimming | Taper                                          | Female | 7  | 1 night    | "      | 458 (14)      | -               | 17 (9)        | 9 (5)          |                |
| Whitworth-Turner et al. 2017 <sup>^</sup> | Soccer   | Training camp                                  | Male   | 11 | 3 nights   | 18 (1) | 488 (65)      | 94 (3)          | 24 (15)       | 6 (9)          |                |
| <b>Mean (SD)</b>                          |          |                                                |        |    |            |        | <b>19 (1)</b> | <b>409 (53)</b> | <b>84 (6)</b> | <b>19 (14)</b> | <b>37 (20)</b> |
| <b>Overall Mean (SD)</b>                  |          |                                                |        |    |            |        | <b>22 (2)</b> | <b>420 (55)</b> | <b>85 (5)</b> | <b>20 (15)</b> | <b>45 (22)</b> |

<sup>^</sup> Indicates only 'control' data included due to manipulation of sleep/wake or recovery behaviour for an experimental trial. \* Indicates mean number of nights per participant.
